# Supplementary material for: Using Multiplex Amplicon PCR Technology to Efficiently and Timely Generate Rift Valley Fever Virus Sequence Data for Genomic Surveillance
Source: MDPI journal article supplement (doi:10.3390/v15020477), 2023-02-09
Supplement: s1 [file s1]

## Supplementary materials

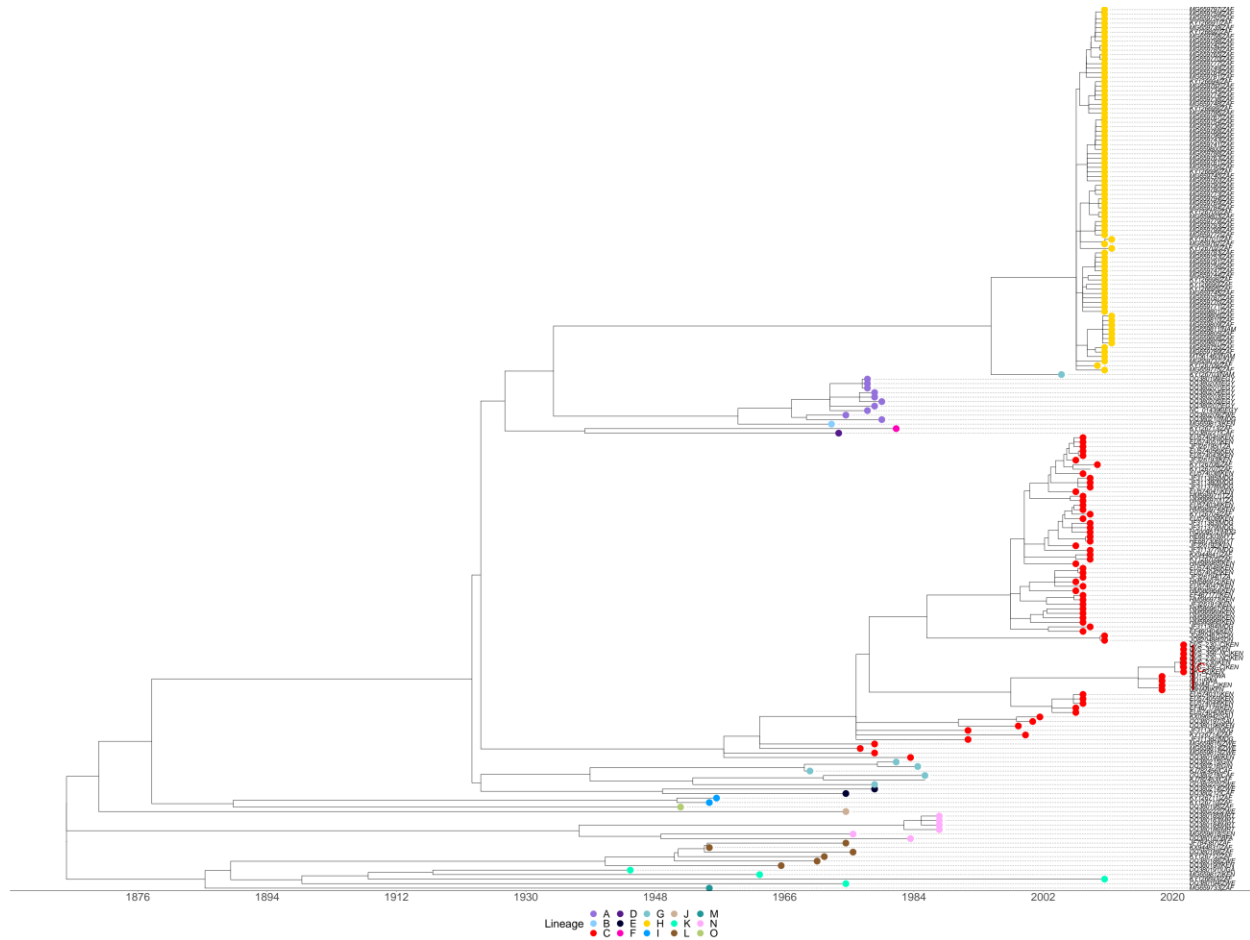

**Figure S1. Molecular clock phylogenetic reconstruction.** Time scaled phylogenetic tree showing the occurrence of lineages from 1951 to 2021. The tips of the phylogenetic tree are colored according to the lineages and are labeled as accession, country code and year.

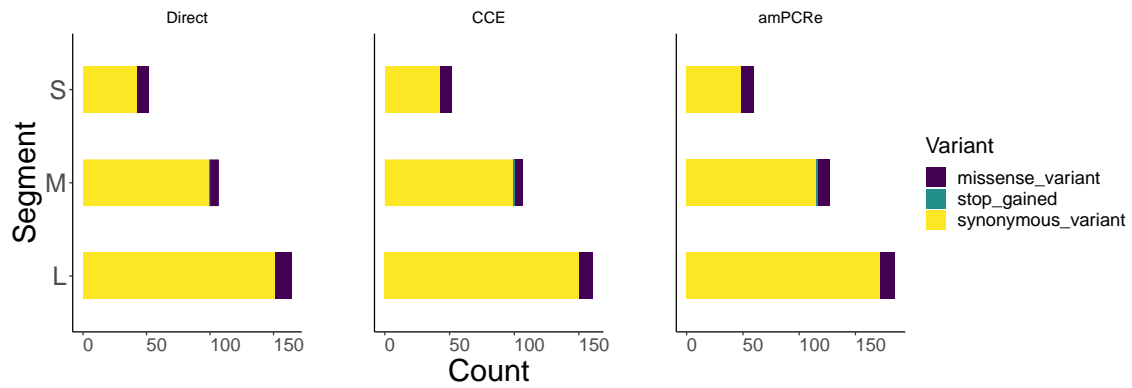

|    | Chrom       | Pos  | Ref | Alt | Variant          | SNP    | Gene | AA.change  | Segment |
|----|-------------|------|-----|-----|------------------|--------|------|------------|---------|
| 1  | NC_014397.1 | 764  | G   | A   | missense_variant | G764A  | RdRp | Arg256Lys  | L       |
| 2  | NC_014397.1 | 851  | G   | A   | missense_variant | G851A  | RdRp | Ser285Asn  | L       |
| 3  | NC_014397.1 | 922  | G   | A   | missense_variant | G922A  | RdRp | Val308Ile  | L       |
| 4  | NC_014397.1 | 1063 | G   | A   | missense_variant | G1063A | RdRp | Val355Met  | L       |
| 5  | NC_014397.1 | 1250 | G   | A   | missense_variant | G1250A | RdRp | Ser418Asn  | L       |
| 6  | NC_014397.1 | 1354 | G   | A   | missense_variant | G1354A | RdRp | As452Asn   | L       |
| 7  | NC_014397.1 | 2005 | G   | A   | missense_variant | G2005A | RdRp | Ala669Thr  | L       |
| 8  | NC_014397.1 | 5335 | A   | G   | missense_variant | A5335G | RdRp | Ile1779Val | L       |
| 9  | NC_014397.1 | 5735 | A   | G   | missense_variant | A5735G | RdRp | Lys1913Arg | L       |
| 10 | NC_014397.1 | 5968 | G   | A   | missense_variant | G5968A | RdRp | As1990Asn  | L       |
| 11 | NC_014396.1 | 715  | T   | A   | missense_variant | T715A  | Gn   | Leu239Gln  | M       |
| 12 | NC_014396.1 | 1717 | A   | G   | missense_variant | A1717G | Gn   | As573Gly   | M       |
| 13 | NC_014396.1 | 1911 | A   | G   | missense_variant | A1911G | Gn   | Ile638Val  | M       |
| 14 | NC_014396.1 | 1913 | A   | G   | missense_variant | A1913G | Gn   | Ile639Met  | M       |
| 15 | NC_014396.1 | 3568 | C   | T   | missense_variant | C3568T | Gc   | Thr1190Ile | M       |
| 16 | NC_014395.1 | 101  | T   | A   | missense_variant | T101A  | NSs  | Phe35Ile   | S       |
| 17 | NC_014395.1 | 105  | G   | A   | missense_variant | G105A  | NSs  | Arg36Lys   | S       |
| 18 | NC_014395.1 | 432  | A   | G   | missense_variant | A432G  | NSs  | Asn145Ser  | S       |
| 19 | NC_014395.1 | 534  | C   | T   | missense_variant | C534T  | NSs  | Ala179Val  | S       |
| 20 | NC_014395.1 | 651  | C   | T   | missense_variant | C651T  | NSs  | Ser218Phe  | S       |
| 21 | NC_014395.1 | 684  | T   | C   | missense_variant | T684C  | NSs  | Val229Ala  | S       |
| 22 | NC_014395.1 | 758  | A   | G   | missense_variant | A758G  | NSs  | Ile254Val  | S       |
| 23 | NC_014395.1 | 764  | C   | T   | missense_variant | C764T  | NSs  | Pro256Ser  | S       |
| 24 | NC_014395.1 | 792  | A   | G   | missense_variant | A792G  | NSs  | Glu265Gly  | S       |
| 25 | NC_014395.1 | 1177 | C   | T   | missense_variant | C1177T | NP   | Gly393Glu  | S       |

**Figure S2. SNPs annotation and summary.** The upper panel shows bar graphs of the SNPs observed in Direct, CCE and amPCRe treated samples. The graphs show the number of SNPs per segment as well as their annotations as synonymous or non-synonymous (stop-gained and missense). The lower panel is a summarized table showing the shared/common SNPs identified in all the three treatments for all the genomic segments.

**Table S1. Sample metadata sheet containing sequencing metrics, geographic information, and ELISA results for outbreak samples.**

| Sample  | Ct <sup>1</sup> | Reads   | %RVFV <sup>2</sup> | Coverage | Depth <sup>3</sup> | Treatment | Segment | Host | Country | OD1   | OD2   |
|---------|-----------------|---------|--------------------|----------|--------------------|-----------|---------|------|---------|-------|-------|
| DK-B2   | 30.6            | 2940000 | 5.1                | 92       | 2105               | amPCRe    | L       | Cow  | Kenya   | 0.067 | 0.29  |
| DK-B2   | 30.6            | 886000  | 0.1                | 24.2     | 6                  | Direct    | L       | Cow  | Kenya   | 0.067 | 0.29  |
| DVS-230 | 25.2            | 3960000 | 13.9               | 95.5     | 6032               | amPCRe    | L       | Cow  | Kenya   | 0.121 | 1.228 |
| DVS-230 | 25.2            | 1668000 | 29.9               | 99.9     | 16019              | CCE       | L       | Cow  | Kenya   | 0.121 | 1.228 |
| DVS-230 | 25.2            | 2848000 | 14.2               | 99.9     | 6811               | Direct    | L       | Cow  | Kenya   | 0.121 | 1.228 |
| DVS-356 | 22.7            | 3640000 | 48.4               | 95.4     | 24230              | amPCRe    | L       | Cow  | Kenya   | 0.079 | 1.151 |
| DVS-356 | 22.7            | 832000  | 21.4               | 99.7     | 5618               | CCE       | L       | Cow  | Kenya   | 0.079 | 1.151 |
| DVS-356 | 22.7            | 1118000 | 41.9               | 99.9     | 8061               | Direct    | L       | Cow  | Kenya   | 0.079 | 1.151 |
| DK-B2   | 30.6            | 2940000 | 87.1               | 91.6     | 61286              | amPCRe    | M       | Cow  | Kenya   | 0.067 | 0.29  |
| DK-B2   | 30.6            | 886000  | 0                  | 32.2     | 8                  | Direct    | M       | Cow  | Kenya   | 0.067 | 0.29  |
| DVS-230 | 25.2            | 3960000 | 25.7               | 95.4     | 18996              | amPCRe    | M       | Cow  | Kenya   | 0.121 | 1.228 |
| DVS-230 | 25.2            | 1668000 | 10                 | 99.6     | 8825               | CCE       | M       | Cow  | Kenya   | 0.121 | 1.228 |
| DVS-230 | 25.2            | 2848000 | 6                  | 99.8     | 4738               | Direct    | M       | Cow  | Kenya   | 0.121 | 1.228 |
| DVS-356 | 22.7            | 3640000 | 34.4               | 98.8     | 28541              | amPCRe    | M       | Cow  | Kenya   | 0.079 | 1.228 |
| DVS-356 | 22.7            | 832000  | 6.2                | 99.6     | 2651               | CCE       | M       | Cow  | Kenya   | 0.079 | 1.151 |
| DVS-356 | 22.7            | 1118000 | 18                 | 99.7     | 5608               | Direct    | M       | Cow  | Kenya   | 0.079 | 1.151 |
| DK-B2   | 30.6            | 2940000 | 5.8                | 93.4     | 9172               | amPCRe    | S       | Cow  | Kenya   | 0.067 | 0.29  |
| DK-B2   | 30.6            | 886000  | 0                  | 72.7     | 18                 | Direct    | S       | Cow  | Kenya   | 0.067 | 0.29  |
| DVS-230 | 25.2            | 3960000 | 8.6                | 94.6     | 14117              | amPCRe    | S       | Cow  | Kenya   | 0.121 | 1.228 |
| DVS-230 | 25.2            | 1668000 | 24                 | 99.8     | 48512              | CCE       | S       | Cow  | Kenya   | 0.121 | 1.228 |
| DVS-230 | 25.2            | 2848000 | 42.5               | 100      | 78662              | Direct    | S       | Cow  | Kenya   | 0.121 | 1.228 |
| DVS-356 | 22.7            | 3640000 | 4                  | 97       | 7306               | amPCRe    | S       | Cow  | Kenya   | 0.079 | 1.151 |
| DVS-356 | 22.7            | 832000  | 15                 | 99.4     | 14815              | CCE       | S       | Cow  | Kenya   | 0.079 | 1.151 |
| DVS-356 | 22.7            | 1118000 | 22.4               | 99.9     | 16335              | Direct    | S       | Cow  | Kenya   | 0.079 | 1.151 |

<sup>1</sup>qRT-PCR cycle threshold values

<sup>2</sup>Percentage number of reads aligning to the Rift Valley fever reference genome segment

<sup>3</sup>Mean genome depth of coverage per genomic segment

**Table S2. Multiplex PCR amplicon primer scheme for the L-segment.** The first column is the reference sequence accession, second column is the start site, third column is the end site, fourth column is the primer name (depicted as either forward, LEFT suffix or reverse depicted with the RIGHT suffix), the fifth column is the pool and the sixth column is the strand.

|             |      |      |                    |   |   |
|-------------|------|------|--------------------|---|---|
| NC_014397.1 | 19   | 47   | rvfv-L-400_1_LEFT  | 1 | + |
| NC_014397.1 | 394  | 416  | rvfv-L-400_1_RIGHT | 1 | - |
| NC_014397.1 | 332  | 355  | rvfv-L-400_2_LEFT  | 2 | + |
| NC_014397.1 | 704  | 731  | rvfv-L-400_2_RIGHT | 2 | - |
| NC_014397.1 | 642  | 664  | rvfv-L-400_3_LEFT  | 1 | + |
| NC_014397.1 | 1022 | 1044 | rvfv-L-400_3_RIGHT | 1 | - |
| NC_014397.1 | 948  | 970  | rvfv-L-400_4_LEFT  | 2 | + |
| NC_014397.1 | 1339 | 1361 | rvfv-L-400_4_RIGHT | 2 | - |
| NC_014397.1 | 1256 | 1280 | rvfv-L-400_5_LEFT  | 1 | + |
| NC_014397.1 | 1636 | 1660 | rvfv-L-400_5_RIGHT | 1 | - |
| NC_014397.1 | 1564 | 1587 | rvfv-L-400_6_LEFT  | 2 | + |
| NC_014397.1 | 1932 | 1954 | rvfv-L-400_6_RIGHT | 2 | - |
| NC_014397.1 | 1861 | 1883 | rvfv-L-400_7_LEFT  | 1 | + |
| NC_014397.1 | 2239 | 2259 | rvfv-L-400_7_RIGHT | 1 | - |
| NC_014397.1 | 2164 | 2186 | rvfv-L-400_8_LEFT  | 2 | + |
| NC_014397.1 | 2545 | 2568 | rvfv-L-400_8_RIGHT | 2 | - |
| NC_014397.1 | 2480 | 2504 | rvfv-L-400_9_LEFT  | 1 | + |

|             |      |      |                     |   |   |
|-------------|------|------|---------------------|---|---|
| NC_014397.1 | 2853 | 2876 | rvfv-L-400_9_RIGHT  | 1 | - |
| NC_014397.1 | 2778 | 2800 | rvfv-L-400_10_LEFT  | 2 | + |
| NC_014397.1 | 3168 | 3193 | rvfv-L-400_10_RIGHT | 2 | - |
| NC_014397.1 | 3094 | 3120 | rvfv-L-400_11_LEFT  | 1 | + |
| NC_014397.1 | 3474 | 3495 | rvfv-L-400_11_RIGHT | 1 | - |
| NC_014397.1 | 3403 | 3427 | rvfv-L-400_12_LEFT  | 2 | + |
| NC_014397.1 | 3790 | 3812 | rvfv-L-400_12_RIGHT | 2 | - |
| NC_014397.1 | 3724 | 3746 | rvfv-L-400_13_LEFT  | 1 | + |
| NC_014397.1 | 4110 | 4133 | rvfv-L-400_13_RIGHT | 1 | - |
| NC_014397.1 | 4047 | 4069 | rvfv-L-400_14_LEFT  | 2 | + |
| NC_014397.1 | 4423 | 4452 | rvfv-L-400_14_RIGHT | 2 | - |
| NC_014397.1 | 4363 | 4387 | rvfv-L-400_15_LEFT  | 1 | + |
| NC_014397.1 | 4731 | 4758 | rvfv-L-400_15_RIGHT | 1 | - |
| NC_014397.1 | 4657 | 4681 | rvfv-L-400_16_LEFT  | 2 | + |
| NC_014397.1 | 5041 | 5067 | rvfv-L-400_16_RIGHT | 2 | - |
| NC_014397.1 | 4968 | 4993 | rvfv-L-400_17_LEFT  | 1 | + |
| NC_014397.1 | 5355 | 5377 | rvfv-L-400_17_RIGHT | 1 | - |
| NC_014397.1 | 5296 | 5319 | rvfv-L-400_18_LEFT  | 2 | + |
| NC_014397.1 | 5674 | 5697 | rvfv-L-400_18_RIGHT | 2 | - |
| NC_014397.1 | 5602 | 5626 | rvfv-L-400_19_LEFT  | 1 | + |
| NC_014397.1 | 5984 | 6008 | rvfv-L-400_19_RIGHT | 1 | - |
| NC_014397.1 | 5906 | 5935 | rvfv-L-400_20_LEFT  | 2 | + |
| NC_014397.1 | 6279 | 6302 | rvfv-L-400_20_RIGHT | 2 | - |

**Table S3. Multiplex PCR amplicon primer scheme for the M-segment.** The first column is the reference sequence accession, second column is the start site, third column is the end site, fourth column is the primer name (depicted as either forward, LEFT suffix or reverse depicted with the RIGHT suffix), the fifth column is the pool and the sixth column is the strand.

|             |      |      |                    |   |   |
|-------------|------|------|--------------------|---|---|
| NC_014396.1 | 0    | 24   | rvfv-M-400_1_LEFT  | 1 | + |
| NC_014396.1 | 396  | 418  | rvfv-M-400_1_RIGHT | 1 | - |
| NC_014396.1 | 329  | 351  | rvfv-M-400_2_LEFT  | 2 | + |
| NC_014396.1 | 708  | 730  | rvfv-M-400_2_RIGHT | 2 | - |
| NC_014396.1 | 638  | 664  | rvfv-M-400_3_LEFT  | 1 | + |
| NC_014396.1 | 1025 | 1046 | rvfv-M-400_3_RIGHT | 1 | - |
| NC_014396.1 | 965  | 987  | rvfv-M-400_4_LEFT  | 2 | + |
| NC_014396.1 | 1345 | 1368 | rvfv-M-400_4_RIGHT | 2 | - |
| NC_014396.1 | 1279 | 1301 | rvfv-M-400_5_LEFT  | 1 | + |
| NC_014396.1 | 1667 | 1690 | rvfv-M-400_5_RIGHT | 1 | - |
| NC_014396.1 | 1581 | 1608 | rvfv-M-400_6_LEFT  | 2 | + |

|             |      |      |                     |   |   |
|-------------|------|------|---------------------|---|---|
| NC_014396.1 | 1969 | 1991 | rvfv-M-400_6_RIGHT  | 2 | - |
| NC_014396.1 | 1908 | 1932 | rvfv-M-400_7_LEFT   | 1 | + |
| NC_014396.1 | 2292 | 2312 | rvfv-M-400_7_RIGHT  | 1 | - |
| NC_014396.1 | 2217 | 2239 | rvfv-M-400_8_LEFT   | 2 | + |
| NC_014396.1 | 2612 | 2636 | rvfv-M-400_8_RIGHT  | 2 | - |
| NC_014396.1 | 2537 | 2560 | rvfv-M-400_9_LEFT   | 1 | + |
| NC_014396.1 | 2934 | 2957 | rvfv-M-400_9_RIGHT  | 1 | - |
| NC_014396.1 | 2867 | 2892 | rvfv-M-400_10_LEFT  | 2 | + |
| NC_014396.1 | 3242 | 3268 | rvfv-M-400_10_RIGHT | 2 | - |
| NC_014396.1 | 3164 | 3186 | rvfv-M-400_11_LEFT  | 1 | + |
| NC_014396.1 | 3551 | 3576 | rvfv-M-400_11_RIGHT | 1 | - |
| NC_014396.1 | 3471 | 3493 | rvfv-M-400_12_LEFT  | 2 | + |
| NC_014396.1 | 3864 | 3885 | rvfv-M-400_12_RIGHT | 2 | - |

**Table S4. Multiplex PCR amplicon primer scheme for the S-segment.** The first column is the reference sequence accession, second column is the start site, third column is the end site, fourth column is the primer name (depicted as either forward, LEFT suffix or reverse depicted with the RIGHT suffix), the fifth column is the pool and the sixth column is the strand.

|             |      |      |                    |   |   |
|-------------|------|------|--------------------|---|---|
| NC_014395.1 | 0    | 22   | rvfv-S-400_1_LEFT  | 1 | + |
| NC_014395.1 | 386  | 408  | rvfv-S-400_1_RIGHT | 1 | - |
| NC_014395.1 | 328  | 350  | rvfv-S-400_2_LEFT  | 2 | + |
| NC_014395.1 | 709  | 731  | rvfv-S-400_2_RIGHT | 2 | - |
| NC_014395.1 | 641  | 667  | rvfv-S-400_3_LEFT  | 1 | + |
| NC_014395.1 | 1031 | 1054 | rvfv-S-400_3_RIGHT | 1 | - |
| NC_014395.1 | 957  | 979  | rvfv-S-400_4_LEFT  | 2 | + |
| NC_014395.1 | 1339 | 1361 | rvfv-S-400_4_RIGHT | 2 | - |
| NC_014395.1 | 1265 | 1286 | rvfv-S-400_5_LEFT  | 1 | + |
| NC_014395.1 | 1658 | 1684 | rvfv-S-400_5_RIGHT | 1 | - |

**Table S5. Multiplex PCR amplicon primers for sequencing RVFV.** S ( $n=10$ ), M ( $n=24$ ), L ( $n=40$ ). The odd numbered primers belong to pool 1 while even numbered primers belong to pool 2. The primers were designed to amplify a target sequence of approximately 400 bases within the RVFV genome. Reference genomes are used to select primer pairs that maximize the likelihood of successful amplification for known virus diversity. A pairwise local alignment score between each candidate and the reference is calculated to ensure the most 'universal' candidate primers are picked for the scheme.

| <i>Primer</i>             | <i>name</i> | <i>pool</i>                 | <i>seq</i> | <i>%gc</i> | <i>Melting temperature (use 65)</i> |
|---------------------------|-------------|-----------------------------|------------|------------|-------------------------------------|
| <i>rvfv-S-400_1_LEFT</i>  | 1           | ACACAAAGACCCCCTAGTGCTT      | 22         | 50.00      | 61.75                               |
| <i>rvfv-S-400_1_RIGHT</i> | 1           | AGGTCAAAGAAAGCCAGTGAGG      | 22         | 50.00      | 60.67                               |
| <i>rvfv-S-400_2_LEFT</i>  | 2           | AGTGATTTCACAAGGTTCCCA       | 22         | 45.45      | 60.01                               |
| <i>rvfv-S-400_2_RIGHT</i> | 2           | TCATGCTAGGAAGTGATGAGCG      | 22         | 50.00      | 60.40                               |
| <i>rvfv-S-400_3_LEFT</i>  | 1           | AGGACATTCTAATGCTGTAGTTCCA   | 26         | 38.46      | 60.74                               |
| <i>rvfv-S-400_3_RIGHT</i> | 1           | TGAATGCAGCAGTGAATAGCAAC     | 23         | 43.48      | 60.37                               |
| <i>rvfv-S-400_4_LEFT</i>  | 2           | GCTGACGGCTTCCATTAGAAT       | 22         | 50.00      | 60.93                               |
| <i>rvfv-S-400_4_RIGHT</i> | 2           | TCCCGGGATGAGTTGACTCTAT      | 22         | 50.00      | 60.28                               |
| <i>rvfv-S-400_5_LEFT</i>  | 1           | AGTGACAGGAAGCCACTCACT       | 21         | 52.38      | 61.14                               |
| <i>rvfv-S-400_5_RIGHT</i> | 1           | AGCTCCCTAGAGATACAAACTATT    | 26         | 38.46      | 59.61                               |
| <i>rvfv-M-400_1_LEFT</i>  | 1           | ACACAAAGACGGTGCATTAAATGT    | 24         | 37.50      | 60.28                               |
| <i>rvfv-M-400_1_RIGHT</i> | 1           | CCTGCCATGGTTTCTCTCCCTA      | 22         | 54.55      | 61.68                               |
| <i>rvfv-M-400_2_LEFT</i>  | 2           | AAGGGTCCTCCTCACAAAAGC       | 22         | 50.00      | 60.94                               |
| <i>rvfv-M-400_2_RIGHT</i> | 2           | TCCCATGAGCACTCTGAAGGT       | 22         | 50.00      | 61.55                               |
| <i>rvfv-M-400_3_LEFT</i>  | 1           | GCTCATCATAGAACTCTACTAGAGGC  | 26         | 46.15      | 60.56                               |
| <i>rvfv-M-400_3_RIGHT</i> | 1           | AACCTCATGTGCAGTGCTGAG       | 21         | 52.38      | 60.98                               |
| <i>rvfv-M-400_4_LEFT</i>  | 2           | ACAAAAATGAAAGGGGTCTGCG      | 22         | 45.45      | 60.14                               |
| <i>rvfv-M-400_4_RIGHT</i> | 2           | CCCCTGATACTTGATCTGCACA      | 23         | 47.83      | 60.12                               |
| <i>rvfv-M-400_5_LEFT</i>  | 1           | CTCTGCTTATGAGTGCACTGCT      | 22         | 50.00      | 60.86                               |
| <i>rvfv-M-400_5_RIGHT</i> | 1           | GGGCAGTGAGCTACTATTTTGGA     | 23         | 47.83      | 60.63                               |
| <i>rvfv-M-400_6_LEFT</i>  | 2           | AGATTACACTCAAGTATCCAGGGATAT | 27         | 37.04      | 59.55                               |
| <i>rvfv-M-400_6_RIGHT</i> | 2           | CTGACCTCCTTCCATCCATCCT      | 22         | 54.55      | 61.15                               |
| <i>rvfv-M-400_7_LEFT</i>  | 1           | GGGTGTATAAGAAGATGGTTGCCA    | 24         | 45.83      | 60.95                               |
| <i>rvfv-M-400_7_RIGHT</i> | 1           | AGTCCAATAGCTCTGGCCCT        | 20         | 55.00      | 60.34                               |
| <i>rvfv-M-400_8_LEFT</i>  | 2           | TGTTGAAGGGGGTCAAGGAAGA      | 22         | 50.00      | 61.42                               |
| <i>rvfv-M-400_8_RIGHT</i> | 2           | TGTTGAAACAGAGCCATCAAAGTC    | 24         | 41.67      | 60.28                               |
| <i>rvfv-M-400_9_LEFT</i>  | 1           | CAGTCAGTTAGAAAAGAGGCCCT     | 23         | 47.83      | 60.25                               |

|                            |   |                             |    |       |       |
|----------------------------|---|-----------------------------|----|-------|-------|
| <i>rvfv-M-400_9_RIGHT</i>  | 1 | ACCCCTCTCAAAGACAACAAAGG     | 23 | 47.83 | 60.95 |
| <i>rvfv-M-400_10_LEFT</i>  | 2 | GCACCAAACCTTATCTCATACAAGC   | 25 | 44.00 | 60.83 |
| <i>rvfv-M-400_10_RIGHT</i> | 2 | CACTGATCTTTTGTTCATTCTCTGA   | 26 | 38.46 | 60.01 |
| <i>rvfv-M-400_11_LEFT</i>  | 1 | TGCCTGTCTATCACATCCACAG      | 22 | 50.00 | 60.01 |
| <i>rvfv-M-400_11_RIGHT</i> | 1 | AGAGGCTGTCTTCCAAGATATAT     | 25 | 40.00 | 59.54 |
| <i>rvfv-M-400_12_LEFT</i>  | 2 | GTTGGTTTGGAGGGCCTCTTAA      | 22 | 50.00 | 60.67 |
| <i>rvfv-M-400_12_RIGHT</i> | 2 | ACACAAAGACCGGTGCAACTT       | 21 | 47.62 | 61.06 |
| <i>rvfv-L-400_1_LEFT</i>   | 1 | TGGATTCTATATTATCAAACAGCTGGT | 28 | 32.14 | 59.61 |
| <i>rvfv-L-400_1_RIGHT</i>  | 1 | TCATCTCCCCTAAAGGTGGTGA      | 22 | 50.00 | 60.41 |
| <i>rvfv-L-400_2_LEFT</i>   | 2 | TGATCATTTGAGCCCTGACATGA     | 23 | 43.48 | 60.31 |
| <i>rvfv-L-400_2_RIGHT</i>  | 2 | ACAGATTCTGTGACTGACCAATTTATT | 27 | 33.33 | 59.83 |
| <i>rvfv-L-400_3_LEFT</i>   | 1 | TCCACAGATGAGGAACTAGGGA      | 22 | 50.00 | 59.87 |
| <i>rvfv-L-400_3_RIGHT</i>  | 1 | GCACAGATCTTTGCCATCGACA      | 22 | 50.00 | 61.69 |
| <i>rvfv-L-400_4_LEFT</i>   | 2 | GCAGAAGACAACCTTAGGGACC      | 22 | 54.55 | 60.80 |
| <i>rvfv-L-400_4_RIGHT</i>  | 2 | TCCACATCATGATCTGGGGAGA      | 22 | 50.00 | 60.55 |
| <i>rvfv-L-400_5_LEFT</i>   | 1 | CATAGCTGCTTTAGGGTTAATGG     | 24 | 45.83 | 59.80 |
| <i>rvfv-L-400_5_RIGHT</i>  | 1 | AAATCCCAGAACCTAGTAGTCGTT    | 24 | 41.67 | 59.55 |
| <i>rvfv-L-400_6_LEFT</i>   | 2 | TGGTCAGTTTGATAGGAGCTGAG     | 23 | 47.83 | 60.06 |
| <i>rvfv-L-400_6_RIGHT</i>  | 2 | CATCCATTGCTGCAGAGTCTGA      | 22 | 50.00 | 60.86 |
| <i>rvfv-L-400_7_LEFT</i>   | 1 | CCTCCTTCTATTCTGGGCAGA       | 22 | 54.55 | 61.67 |
| <i>rvfv-L-400_7_RIGHT</i>  | 1 | AAGCAGTGGAGCGCCCTGAAA       | 20 | 55.00 | 62.35 |
| <i>rvfv-L-400_8_LEFT</i>   | 2 | AGAGAATAGCAGGTGAGCCCTT      | 22 | 50.00 | 61.08 |
| <i>rvfv-L-400_8_RIGHT</i>  | 2 | CCTTCTAGAGTCAACCCACTGA      | 23 | 47.83 | 59.68 |
| <i>rvfv-L-400_9_LEFT</i>   | 1 | AGTCTTAAGGAGCCTCTATGGACA    | 24 | 45.83 | 60.66 |
| <i>rvfv-L-400_9_RIGHT</i>  | 1 | AAGAACTTCCCTATAGACCTGGC     | 23 | 47.83 | 59.55 |
| <i>rvfv-L-400_10_LEFT</i>  | 2 | CAGCATGGAGGTCTGAGAGAGA      | 22 | 54.55 | 61.13 |
| <i>rvfv-L-400_10_RIGHT</i> | 2 | AGAGATCCATCACAAAGTCATCTCT   | 25 | 40.00 | 59.73 |
| <i>rvfv-L-400_11_LEFT</i>  | 1 | TGTTTACCAGGAAAAGGATGATGATG  | 26 | 38.46 | 60.06 |
| <i>rvfv-L-400_11_RIGHT</i> | 1 | GCATATAGCTGCGGCCACTTT       | 21 | 52.38 | 61.52 |
| <i>rvfv-L-400_12_LEFT</i>  | 2 | TGCAAGGATCAGATGATAGTAGCA    | 24 | 41.67 | 59.73 |
| <i>rvfv-L-400_12_RIGHT</i> | 2 | AATAGCTCAGACACTCCCATGC      | 22 | 50.00 | 60.34 |
| <i>rvfv-L-400_13_LEFT</i>  | 1 | GTGGGTCACTTCTCCTTAGCTGC     | 22 | 54.55 | 61.18 |
| <i>rvfv-L-400_13_RIGHT</i> | 1 | TCTGGTATGTTCAAACGGTCTCT     | 23 | 43.48 | 59.68 |

|                            |   |                               |    |       |       |
|----------------------------|---|-------------------------------|----|-------|-------|
| <i>rvfv-L-400_14_LEFT</i>  | 2 | GGTGGCGCTCTAATTCTTAGCT        | 22 | 50.00 | 60.66 |
| <i>rvfv-L-400_14_RIGHT</i> | 2 | CGGGAATAGGAATAATATATCTTCTGGCT | 29 | 37.93 | 61.03 |
| <i>rvfv-L-400_15_LEFT</i>  | 1 | AGTACAGCTTGCTACAAAAGATGG      | 24 | 41.67 | 59.62 |
| <i>rvfv-L-400_15_RIGHT</i> | 1 | CCTAACTGAATGTGGTTATTCACTGG    | 27 | 40.74 | 60.85 |
| <i>rvfv-L-400_16_LEFT</i>  | 2 | TGGCTGAATGGGAAAAGCTAAAGA      | 24 | 41.67 | 61.08 |
| <i>rvfv-L-400_16_RIGHT</i> | 2 | GGTTTTGTCTTACCCTCTGATTCT      | 26 | 38.46 | 60.01 |
| <i>rvfv-L-400_17_LEFT</i>  | 1 | GGCCCATATAGTGAGAGCTATAAGC     | 25 | 48.00 | 60.83 |
| <i>rvfv-L-400_17_RIGHT</i> | 1 | TGTTTGTGACCCCATGTCTTC         | 22 | 50.00 | 60.93 |
| <i>rvfv-L-400_18_LEFT</i>  | 2 | TCACAACAACTGTCAGAGCAGC        | 23 | 47.83 | 61.05 |
| <i>rvfv-L-400_18_RIGHT</i> | 2 | TGGCTCCCTCTCAAATAATTGCA       | 23 | 43.48 | 60.57 |
| <i>rvfv-L-400_19_LEFT</i>  | 1 | AACTGCATCAGACAATGATCTCA       | 24 | 41.67 | 60.65 |
| <i>rvfv-L-400_19_RIGHT</i> | 1 | TCCATCTCGTAAGGACCACTAACA      | 24 | 45.83 | 61.14 |
| <i>rvfv-L-400_20_LEFT</i>  | 2 | TGATGCGTTAATGGATCTAATGATAGAAG | 29 | 34.48 | 60.32 |
| <i>rvfv-L-400_20_RIGHT</i> | 2 | TGGTCTTAGCCTAGCATGTCATC       | 23 | 47.83 | 60.18 |

**Table S6. Sequence accessions and metadata (n = 196) used in molecular phylogenetic analyses.** The Accession column is separated by '|' with the first string showing the accession from NCBI or strain of sequenced data in this study, the second part is the 3-letter country code and the third is the year of sample collection. The second column additionally provides the year of sample collection.

| <i>Accession</i>          | <i>Country</i> |
|---------------------------|----------------|
| <i>DQ380187 BFA 1983</i>  | BFA            |
| <i>KJ782453 CAF 1985</i>  | CAF            |
| <i>DQ380212 CAF 1974</i>  | CAF            |
| <i>KJ782456 CAF 1969</i>  | CAF            |
| <i>DQ380219 CAF 1985</i>  | CAF            |
| <i>DQ380221 CAF 1973</i>  | CAF            |
| <i>DQ380205 EGY 1979</i>  | EGY            |
| <i>DQ380203 EGY 1978</i>  | EGY            |
| <i>DQ380201 EGY 1977</i>  | EGY            |
| <i>DQ380200 EGY 1977</i>  | EGY            |
| <i>DQ380199 EGY 1977</i>  | EGY            |
| <i>DQ380207 EGY 1978</i>  | EGY            |
| <i>DQ380204 EGY 1978</i>  | EGY            |
| <i>NC_014396 EGY 1977</i> | EGY            |
| <i>DQ380216 GIN 1984</i>  | GIN            |
| <i>DQ380215 GIN 1981</i>  | GIN            |
| <i>EU574044 KEN 2007</i>  | KEN            |
| <i>EU574043 KEN 2007</i>  | KEN            |
| <i>EU574042 KEN 2007</i>  | KEN            |
| <i>EU574041 KEN 2006</i>  | KEN            |
| <i>EU574040 KEN 2006</i>  | KEN            |
| <i>EU574039 KEN 2007</i>  | KEN            |



|                            |     |
|----------------------------|-----|
| <i>EU574038 KEN 2007</i>   | KEN |
| <i>EU574045 KEN 2007</i>   | KEN |
| <i>EU574047 KEN 2007</i>   | KEN |
| <i>08HAB KEN 2018</i>      | KEN |
| <i>EU574034 KEN 2007</i>   | KEN |
| <i>HM586974 KEN 2007</i>   | KEN |
| <i>HM586973 KEN 2007</i>   | KEN |
| <i>HM586972 KEN 2006</i>   | KEN |
| <i>JF326191 KEN 2007</i>   | KEN |
| <i>JF326192 KEN 2006</i>   | KEN |
| <i>HM586969 KEN 2007</i>   | KEN |
| <i>EU574048 KEN 2007</i>   | KEN |
| <i>HM586968 KEN 2007</i>   | KEN |
| <i>HM586966 KEN 2007</i>   | KEN |
| <i>HM586965 KEN 2006</i>   | KEN |
| <i>HM586964 KEN 2006</i>   | KEN |
| <i>EU574056 KEN 2007</i>   | KEN |
| <i>EU574055 KEN 2007</i>   | KEN |
| <i>EU574051 KEN 2007</i>   | KEN |
| <i>HM586967 KEN 2007</i>   | KEN |
| <i>EU574031 KEN 2007</i>   | KEN |
| <i>EF460404 KEN 2007</i>   | KEN |
| <i>EF467177 KEN 2007</i>   | KEN |
| <i>08HAB-C KEN 2018</i>    | KEN |
| <i>DK-B2 KEN 2021</i>      | KEN |
| <i>DQ380190 KEN 1965</i>   | KEN |
| <i>EF467178 KEN 2006</i>   | KEN |
| <i>MG659812 KEN 1962</i>   | KEN |
| <i>DQ380196 KEN 1998</i>   | KEN |
| <i>DQ380198 KEN 1983</i>   | KEN |
| <i>MG659813 KEN 1972</i>   | KEN |
| <i>DVS-230-NC KEN 2021</i> | KEN |
| <i>JF326193 KEN 2006</i>   | KEN |
| <i>DVS-356-C KEN 2021</i>  | KEN |
| <i>DVS-356 KEN 2021</i>    | KEN |
| <i>DVS-356-NC KEN 2021</i> | KEN |
| <i>DVS-230 KEN 2021</i>    | KEN |
| <i>DVS-230-C KEN 2021</i>  | KEN |
| <i>JF311381 MDG 1991</i>   | MDG |
| <i>JF311380 MDG 2008</i>   | MDG |
| <i>JF311379 MDG 2008</i>   | MDG |
| <i>JF311384 MDG 2008</i>   | MDG |
| <i>JF311382 MDG 1991</i>   | MDG |
| <i>JF311378 MDG 2008</i>   | MDG |
| <i>JF311377 MDG 2008</i>   | MDG |
| <i>JF311383 MDG 2008</i>   | MDG |
| <i>HQ009512 MDG 2008</i>   | MDG |
| <i>DQ380210 MDG 1979</i>   | MDG |
| <i>JF311385 MDG 2008</i>   | MDG |
| <i>DQ380184 MRT 1987</i>   | MRT |
| <i>DQ380186 MRT 1987</i>   | MRT |
| <i>DQ380183 MRT 1987</i>   | MRT |
| <i>DQ380185 MRT 1987</i>   | MRT |
| <i>HE687306 MYT 2008</i>   | MYT |
| <i>HE687303 MYT 2008</i>   | MYT |
| <i>MT561460 NAM 2010</i>   | NAM |
| <i>MG659811 NAM 2011</i>   | NAM |
| <i>KY126703 NAM 2004</i>   | NAM |
| <i>RU1 RWA 2018</i>        | RWA |

|                          |     |
|--------------------------|-----|
| <i>RU1-C/RWA/2018</i>    | RWA |
| <i>DQ380197/SAU/2000</i> | SAU |
| <i>KX096942/SAU/2001</i> | SAU |
| <i>JQ820488/SDN/2010</i> | SDN |
| <i>JQ820487/SDN/2010</i> | SDN |
| <i>MG659818/SEN/1975</i> | SEN |
| <i>HM586970/TZA/2007</i> | TZA |
| <i>HM586971/TZA/2007</i> | TZA |
| <i>JF326195/TZA/2007</i> | TZA |
| <i>JF326194/TZA/2007</i> | TZA |
| <i>DQ380191/UGA/1944</i> | UGA |
| <i>MG659763/ZAF/2010</i> | ZAF |
| <i>MG659784/ZAF/2010</i> | ZAF |
| <i>MG659783/ZAF/2010</i> | ZAF |
| <i>MG659782/ZAF/2010</i> | ZAF |
| <i>MG659781/ZAF/2010</i> | ZAF |
| <i>MG659780/ZAF/2010</i> | ZAF |
| <i>MG659779/ZAF/2010</i> | ZAF |
| <i>MG659777/ZAF/2010</i> | ZAF |
| <i>MG659776/ZAF/2010</i> | ZAF |
| <i>MG659775/ZAF/2010</i> | ZAF |
| <i>MG659774/ZAF/2010</i> | ZAF |
| <i>MG659785/ZAF/2010</i> | ZAF |
| <i>MG659772/ZAF/2010</i> | ZAF |
| <i>MG659771/ZAF/2010</i> | ZAF |
| <i>MG659770/ZAF/2010</i> | ZAF |
| <i>MG659769/ZAF/2010</i> | ZAF |
| <i>MG659768/ZAF/2010</i> | ZAF |
| <i>MG659767/ZAF/2010</i> | ZAF |
| <i>MG659765/ZAF/2010</i> | ZAF |
| <i>MG659764/ZAF/2010</i> | ZAF |
| <i>MG659762/ZAF/2010</i> | ZAF |
| <i>MG659773/ZAF/2010</i> | ZAF |
| <i>MG659787/ZAF/2010</i> | ZAF |
| <i>MG659788/ZAF/2010</i> | ZAF |
| <i>DQ380195/ZAF/1951</i> | ZAF |
| <i>MG659810/ZAF/2011</i> | ZAF |
| <i>MG659809/ZAF/2011</i> | ZAF |
| <i>MG659808/ZAF/2011</i> | ZAF |
| <i>MG659807/ZAF/2011</i> | ZAF |
| <i>MG659806/ZAF/2011</i> | ZAF |
| <i>MG659805/ZAF/2011</i> | ZAF |
| <i>MG659803/ZAF/2010</i> | ZAF |
| <i>MG659801/ZAF/2010</i> | ZAF |
| <i>MG659800/ZAF/2010</i> | ZAF |
| <i>MG659799/ZAF/2010</i> | ZAF |
| <i>MG659798/ZAF/2010</i> | ZAF |
| <i>MG659797/ZAF/2010</i> | ZAF |
| <i>MG659796/ZAF/2010</i> | ZAF |
| <i>MG659795/ZAF/2010</i> | ZAF |
| <i>DQ380189/ZAF/1975</i> | ZAF |
| <i>MG659794/ZAF/2010</i> | ZAF |
| <i>MG659793/ZAF/2010</i> | ZAF |
| <i>MG659791/ZAF/2010</i> | ZAF |
| <i>MG659761/ZAF/2010</i> | ZAF |
| <i>MG659789/ZAF/2010</i> | ZAF |
| <i>MG659786/ZAF/2010</i> | ZAF |
| <i>MG659790/ZAF/2010</i> | ZAF |
| <i>MG659759/ZAF/2010</i> | ZAF |

|                   |     |
|-------------------|-----|
| MG659758 ZAF 2010 | ZAF |
| KY126710 ZAF 1955 | ZAF |
| KY126709 ZAF 2009 | ZAF |
| MG659760 ZAF 2010 | ZAF |
| KY126707 ZAF 2008 | ZAF |
| KY126705 ZAF 2008 | ZAF |
| KY126704 ZAF 2008 | ZAF |
| KY126702 ZAF 2011 | ZAF |
| KY126701 ZAF 2011 | ZAF |
| KY126700 ZAF 2010 | ZAF |
| KY126711 ZAF 1956 | ZAF |
| KY126699 ZAF 2010 | ZAF |
| KY126696 ZAF 2010 | ZAF |
| KY126695 ZAF 2010 | ZAF |
| KY126694 ZAF 2010 | ZAF |
| KY126692 ZAF 2010 | ZAF |
| KY126691 ZAF 2010 | ZAF |
| KY126690 ZAF 2010 | ZAF |
| KX944841 ZAF 2008 | ZAF |
| KX944831 ZAF 1955 | ZAF |
| JF784387 ZAF 1974 | ZAF |
| KY126698 ZAF 2010 | ZAF |
| KY126712 ZAF 1971 | ZAF |
| KY126708 ZAF 2009 | ZAF |
| KY126714 ZAF 1999 | ZAF |
| MG659756 ZAF 2010 | ZAF |
| MG659755 ZAF 2010 | ZAF |
| MG659754 ZAF 2010 | ZAF |
| MG659753 ZAF 2010 | ZAF |
| MG659752 ZAF 2010 | ZAF |
| MG659749 ZAF 2010 | ZAF |
| KY126713 ZAF 1981 | ZAF |
| MG659748 ZAF 2010 | ZAF |
| MG659747 ZAF 2010 | ZAF |
| MG659745 ZAF 2010 | ZAF |
| KY126693 ZAF 2010 | ZAF |
| MG659743 ZAF 2010 | ZAF |
| MG659742 ZAF 2010 | ZAF |
| MG659741 ZAF 2010 | ZAF |
| MG659740 ZAF 2010 | ZAF |
| MG659739 ZAF 2010 | ZAF |
| MG659738 ZAF 2010 | ZAF |
| MG659737 ZAF 2010 | ZAF |
| MG659736 ZAF 2010 | ZAF |
| MG659734 ZAF 2010 | ZAF |
| MG659744 ZAF 2010 | ZAF |
| MG659733 ZAF 1955 | ZAF |
| DQ380188 ZWE 1970 | ZWE |
| DQ380222 ZWE 1974 | ZWE |
| MG659816 ZWE 1978 | ZWE |
| DQ380214 ZWE 1978 | ZWE |
| MG659814 ZWE 1976 | ZWE |
| DQ380220 ZWE 1978 | ZWE |
| DQ380194 ZWE 1974 | ZWE |
| MG659815 ZWE 1978 | ZWE |
| DQ380209 ZWE 1974 | ZWE |
